# Supplementary material
Source: bioRxiv or medRxiv preprint supplement (https://www.biorxiv.org/highwire/filestream/130491/field_highwire_adjunct_files/5/434654-3.pdf)
Supplement: Supplementary file [file 434654-3.pdf]

1 **Table S2.** Effects of warming and precipitation treatments (fixed effects) on soil moisture in  
 2 the summer and the fall, using a mixed-effects model that included the fixed effect of time  
 3 and the random effect of blocks. P values for Type III sum of squares with a Satterthwaite  
 4 approximation for the degrees of freedom. Significance codes: P < 0.001 '\*\*\*', 0.01 < P <  
 5 0.05 '\*'.  
 6

|               | <b>Sum. Sq.</b> | <b>Mean Sq.</b> | <b>num df</b> | <b>den df</b> | <b>F</b> | <b>P</b>   |
|---------------|-----------------|-----------------|---------------|---------------|----------|------------|
| Precip        | 0.034           | 0.017           | 2             | 61.271        | 17.287   | < 0.001*** |
| Temp          | 0.005           | 0.002           | 3             | 61.626        | 1.556    | 0.209      |
| Season        | 0.017           | 0.017           | 1             | 61.558        | 17.344   | < 0.001*** |
| Precip:Temp   | 0.011           | 0.002           | 6             | 61.166        | 1.825    | 0.109      |
| Precip:Season | 0.008           | 0.004           | 2             | 61.271        | 4.009    | 0.023*     |
| Temp:Season   | 0.005           | 0.002           | 3             | 61.626        | 1.568    | 0.206      |

7
